# Supplementary material for: Posttransplantation Lymphoproliferative Disease Treated by Retransplantation
Source: Hindawi journal article supplement (doi:10.1155/2020/9403123), 2020-02-25
Supplement: f1 [file 9403123.f1.pdf]

## **Supplementary material**

### **Flow cytometry and peptide-MHC multimer staining**

Dextramers specific for EBV HLA-A\*0201/GLCTLVAML, EBV HLA-B\*07:02/RPQGGSRPEFVK or an irrelevant peptide HLA-A\*0201/ SLYNTVATL (NEG), APC-labeled, (all from Immudex, Copenhagen, Denmark) were used for the detection of EBV-specific CD8<sup>+</sup> T cells. PBMCs were stained according to the manufacturer's recommendation. The following antibodies were added for appropriate gating of the cells; anti-CD3-FITC (eBioscience, Thermo Fisher Scientific, Waltham, MA, USA), anti-CD4-PE-Cy7 (eBioscience), anti-CD8-BV605 (BioLegend, San Diego, CA, USA). Cells were acquired on a BD FACSCanto flow cytometer (BD Biosciences, San Jose, CA 95131, USA) and the data analyzed using FlowJo software (Treestar Inc., Ashland, OR, USA).

### **Gating strategy**

Cells were gated on live cells based on forward scatter (FSC) and side scatter (SSC) (gate A). CD3<sup>+</sup> T cells (gate B) were selected and analyzed for the expression of CD4 and CD8 (gate C). CD8<sup>+</sup> T cells were further selected and the percentage of identified multimer<sup>+</sup> CD8<sup>+</sup> T cells reported of the total number of CD8<sup>+</sup> T cells (gate D) (see Supplementary figure 1).

### **IFN- $\gamma$ ELISPOT assay**

IFN- $\gamma$  ELISPOT assays were performed on PBMCs *ex vivo*. Anti-IFN- $\gamma$  coating antibody was purchased from Mabtech (Nacka Strand, Sweden) and used to coat MultiScreenHTS HA filter plates (Merck Millipore Burlington, MA, USA). PBMCs were tested against overlapping 15-mer peptide library PepMix™ Collection EBV (JPT Peptide Technologies, Berlin, Germany) with 14 peptide pools spanning the corresponding antigenic epitopes. Negative controls with 1% DMSO and positive controls with SEC-3 superantigen (0.1 $\mu$ g/ml) (Toxin Technology Inc, USA) and CEF I PepMix™ Peptide Pool (JPT

Peptide Technologies) were included. PBMCs were seeded at  $2 \times 10^5$  cells per well and all conditions were tested in triplicates. Plates were incubated for 24 hours prior to the addition of detection reagents anti-IFN- $\gamma$ -biotin and streptavidin-alkaline phosphatase enzyme conjugate (both from Mabtech) and BCIP/NBT substrate (Sigma-Aldrich, Saint-Louis, Missouri, USA). Spots were enumerated using an automated analyzer, CTL IMMUNOSPOT S5 VERSA-02-9030 (Cellular Technology Ltd, Shaker Heights, USA). Specific spots were calculated by subtracting the mean number of spots + (2 $\times$ SD) of the medium-only control from the mean number of spots of experimental wells.

### **Statistical analysis**

Statistics were made with 1-way ANOVA (multiple comparisons) with Dunnett correction using GraphPad Prism version 6.0 (GraphPad Software, San Diego, CA, USA). \*  $p < 0.05$ , \*\*  $p < 0.01$ , \*\*\*  $p < 0.001$ , \*\*\*\*  $p < 0.0001$ .

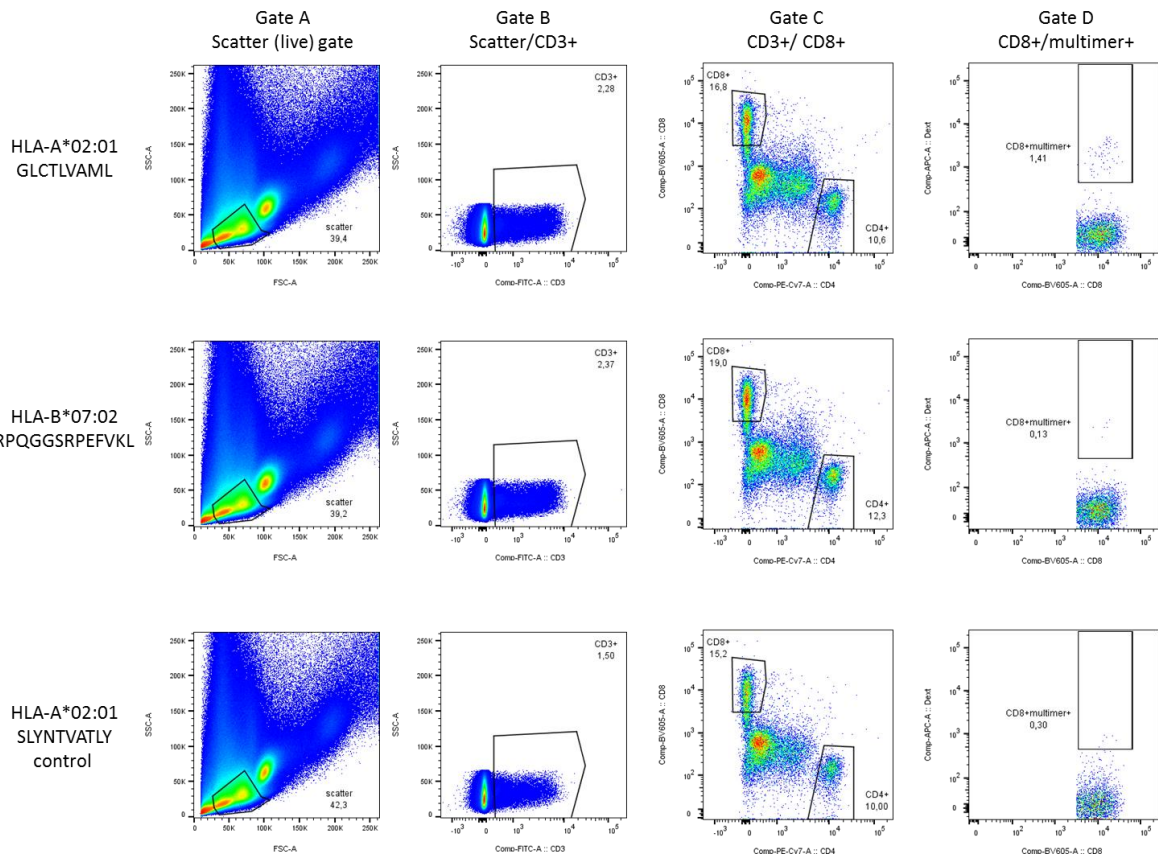

**Supplementary figure 1. Gating strategy for detection of EBV-specific CD8<sup>+</sup> T cells.**

Peripheral blood mononuclear cells were gated on live cells based on forward scatter (FSC) and side scatter (SSC) (gate A). CD3<sup>+</sup> T cells (gate B) were selected and analyzed for the expression of CD4 and CD8 (gate C). CD8<sup>+</sup> T cells were further selected and the percentage of identified multimer<sup>+</sup> CD8<sup>+</sup> T cells reported of the total number of CD8<sup>+</sup> T cells (gate D).
